# Supplementary material for: Active site-exposed Bi2WO6@BiOCl heterostructures for photocatalytic hydrogenation of nitroaromatic compounds
Source: Royal Society of Chemistry journal article supplement (doi:10.1039/d4nr03346a), 2024-01-01
Supplement: d4nr03346a1.pdf [file d4nr03346a1.pdf]

## Supporting Information

### Active site-exposed $\text{Bi}_2\text{WO}_6@\text{BiOCl}$ heterostructure for photocatalytic hydrogenation of nitroaromatic compounds

Le Liao<sup>a</sup>, Guanshun Xie<sup>a</sup>, Changqiang Yu<sup>a</sup>, Zhaohui Huang<sup>a</sup>, Senlin Zhang<sup>a</sup>, Tongzheng Zhang<sup>a</sup>, Xiuqiang Xie<sup>\*a</sup>, and Nan Zhang<sup>\*a</sup>

<sup>a</sup>College of Materials Science and Engineering, Hunan University, P. R. China.

\*Corresponding authors.

E-mail: [nanzhang@hnu.edu.cn](mailto:nanzhang@hnu.edu.cn); [xiuqiang\\_xie@hnu.edu.cn](mailto:xiuqiang_xie@hnu.edu.cn).

### Contents list

**Fig. S1.** Particle size distribution of BOC.

**Fig. S2.** SEM image of BOC.

**Fig. S3.** Particle size distribution of BWO.

**Fig. S4.** SEM images of BWO.

**Fig. S5.** SEM image of 10-BWO@BOC.

**Fig. S6.** UV-vis absorption spectra of 4-NA photocatalyzed by 10-BWO@BOC catalyst under UV-vis light irradiation using ammonium formate as a hole sacrificial agent.

**Fig. S7.** (a) Decay curves of photovoltage and (b) electron lifetime of BOC, BWO, and 10-BWO@BOC composites.

**Fig. S8.** The 2D diagram of *in situ* DRIFTS spectra of the 10-BWO@BOC for the adsorption of a mixture of  $\text{H}_2\text{O}$  and 4-NA for 20 minutes in the dark and under UV-vis light irradiation for another 20 minutes.

**Table S1.** TRPL decay lifetimes ( $\tau_1$ ,  $\tau_2$ ,  $\tau_3$ , and  $\tau_{\text{ave}}$ ) of the prepared samples.

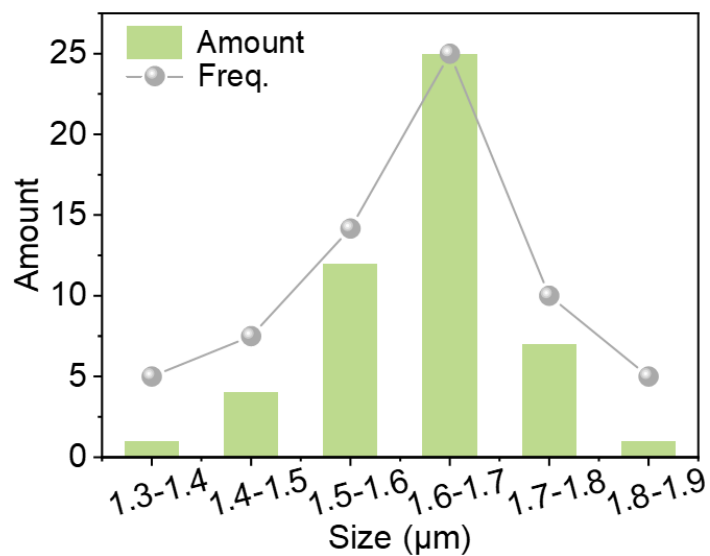

**Fig. S1.** Particle size distribution of BOC.

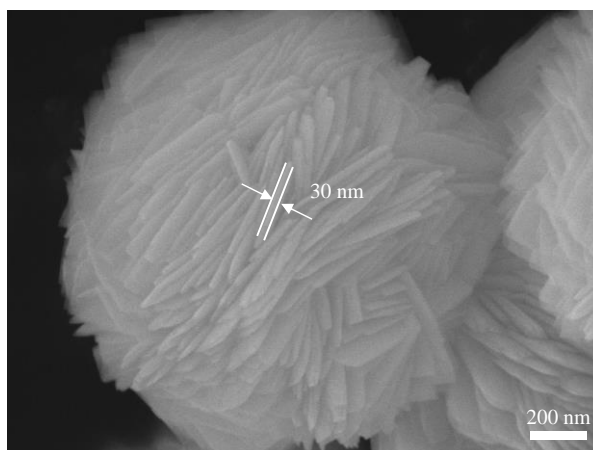

**Fig. S2.** SEM image of BOC.

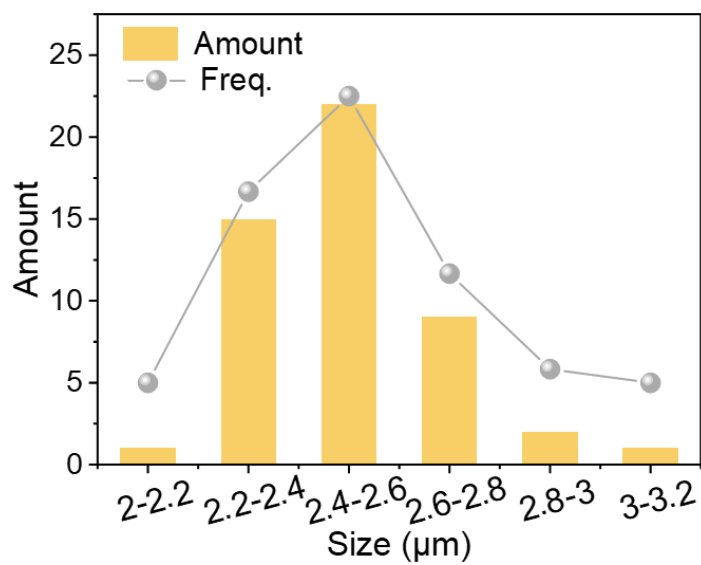

**Fig. S3.** Particle size distribution of BWO.

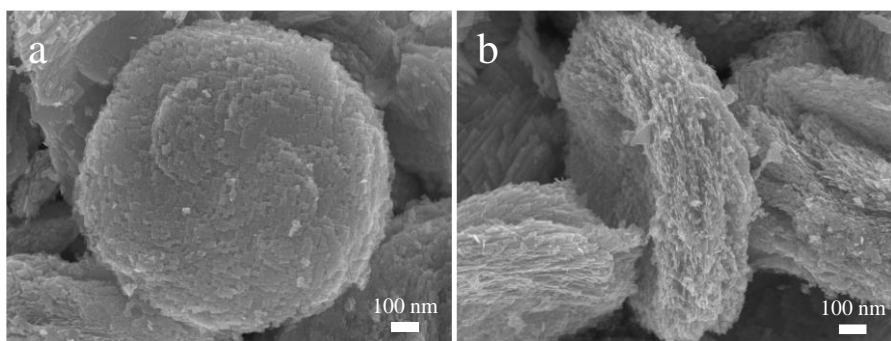

**Fig. S4.** SEM images of BWO.

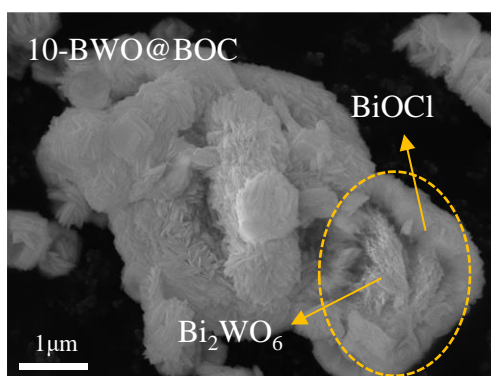

**Fig. S5.** SEM image of 10-BWO@BOC.

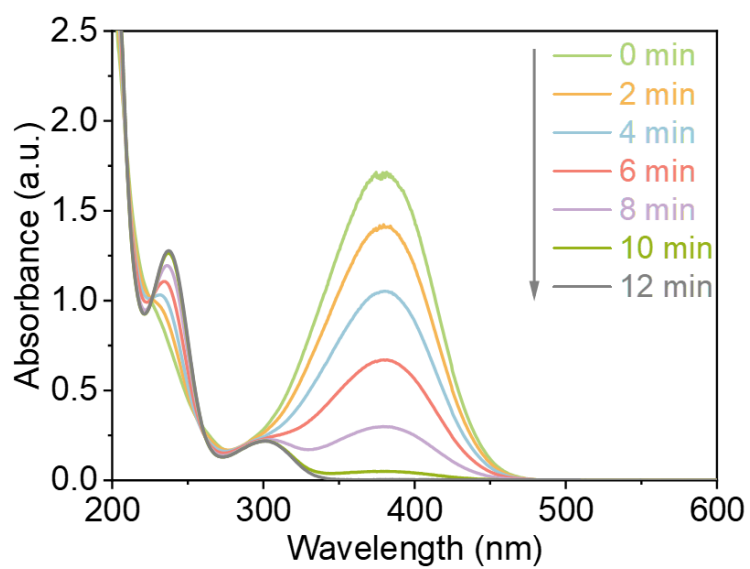

**Fig. S6.** UV-vis absorption spectra of 4-NA photocatalyzed by 10-BWO@BOC catalyst under UV-vis light irradiation using ammonium formate as a hole sacrificial agent.

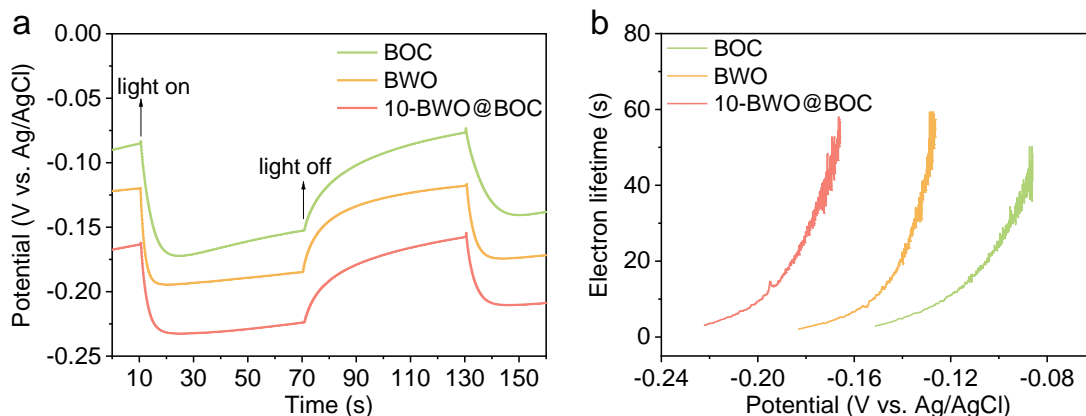

**Fig. S7.** (a) Decay curves of photovoltage and (b) electron lifetime of BOC, BWO, and 10-BWO@BOC composites.

**Supplementary Note:** The electron lifetime in **Fig. S7b** is counted according to the following formula:<sup>1</sup>

$$\tau_n = (k_B T / e) * (dV_{OC} / dt)^{-1}$$

where  $\tau_n$  is the electron lifetime,  $k_B$  is the Boltzmann constant ( $1.3806 \times 10^{-23}$  J/K),  $T$  is the temperature (298.15 K),  $e$  is the charge of one electron ( $1.602 \times 10^{-19}$  C), and  $V_{OC}$  is the open circuit voltage at time  $t$  (**Fig. S7a**).

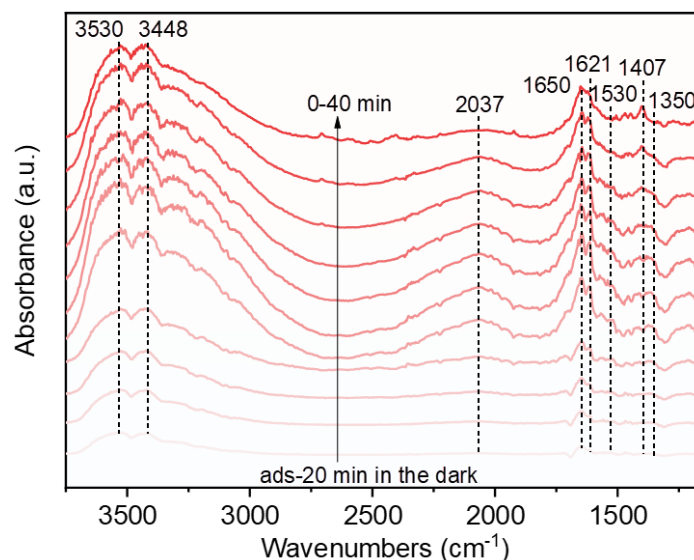

**Fig. S8.** The 2D diagram of *in situ* DRIFTS spectra of the 10-BWO@BOC for the adsorption of a mixture of  $H_2O$  and 4-NA for 20 minutes in the dark and under UV-vis light irradiation for another 20 minutes.

**Table S1.** TRPL decay lifetimes ( $\tau_1$ ,  $\tau_2$ ,  $\tau_3$ , and  $\tau_{ave}$ ) of the prepared samples.

| Sample         | $\tau_1$<br>(ns) | T <sub>1</sub> ration<br>(%) | $\tau_2$<br>(ns) | T <sub>2</sub> ration<br>(%) | $\tau_3$<br>(ns) | T <sub>3</sub> ration<br>(%) | $\tau_{ave}$<br>(ns) |
|----------------|------------------|------------------------------|------------------|------------------------------|------------------|------------------------------|----------------------|
| BWO            | 1.04             | 75.27                        | 3.25             | 11.76                        | 17.87            | 12.98                        | 3.48                 |
| BOC            | 0.75             | 26.27                        | 3.13             | 49.07                        | 14.94            | 24.26                        | 5.38                 |
| 5-<br>BWO@BOC  | 0.67             | 33.06                        | 2.80             | 43                           | 20.00            | 23.94                        | 6.21                 |
| 10-<br>BWO@BOC | 0.70             | 39.14                        | 2.88             | 37.79                        | 21.37            | 23.07                        | 6.29                 |
| 15-<br>BWO@BOC | 0.71             | 37.23                        | 2.49             | 38.42                        | 19.66            | 24.35                        | 6.01                 |

The lifetimes ( $\tau_1$ ,  $\tau_2$ , and  $\tau_3$ ) were acquired by fitting the TRPL decay spectra, obtained with an excitation wavelength of 370 nm, of prepared samples using a tri-exponential function of  $I(t) = \sum T_i \exp(-t/\tau_i)$  ( $i = 1, 2$ , and  $3$ ). The average lifetime constants ( $\tau_{ave}$ ) were counted using the formula of  $\tau_{ave} = \frac{\tau_1 * T_1}{(T_1 + T_2 + T_3)} + \frac{\tau_2 * T_2}{(T_1 + T_2 + T_3)} + \frac{\tau_3 * T_3}{(T_1 + T_2 + T_3)}$ .

- 1 Rabell, G. O.; Alfaro Cruz, M. R.; Juárez-Ramírez, I. *Int. J. Hydrogen Energy*, 2022, **47**, 7770-7782.
- 2 Zhang, S.; Yuan, Y.; Gu, J.; Huang, X.; Li, P.; Yin, K.; Xiao, Z.; Wang, D. *Appl. Surf. Sci.*, 2023, **609**, 155446.
